# Supplementary figures and images for: Perceptual Learning via Modification of Cortical Top-Down Signals
Source: PLOS journal article supplement (doi:10.1371/journal.pcbi.0030165), 2007-08-15

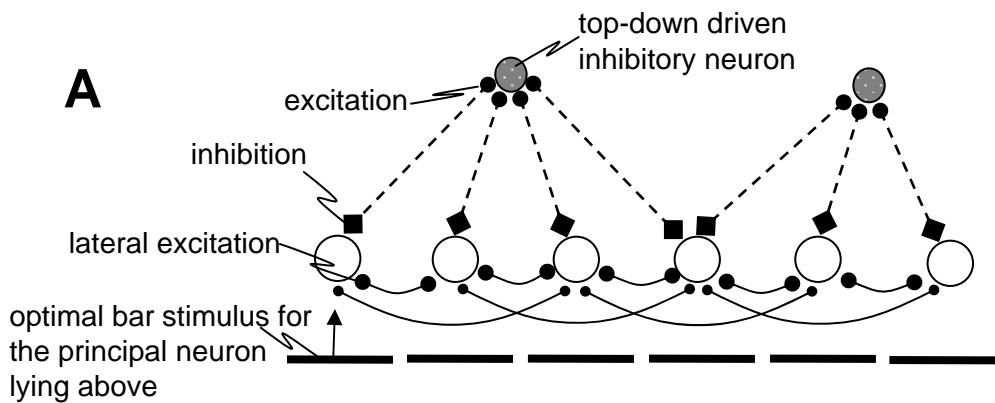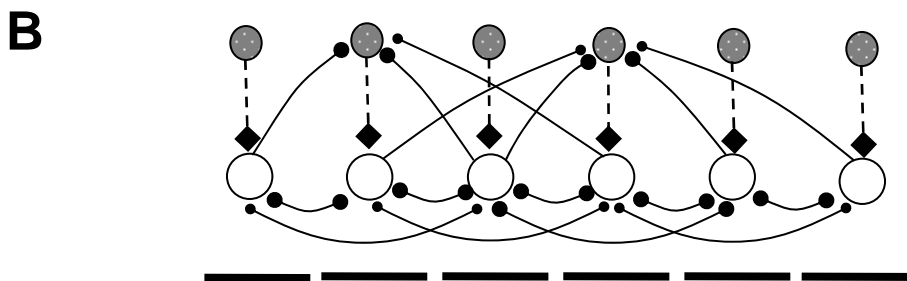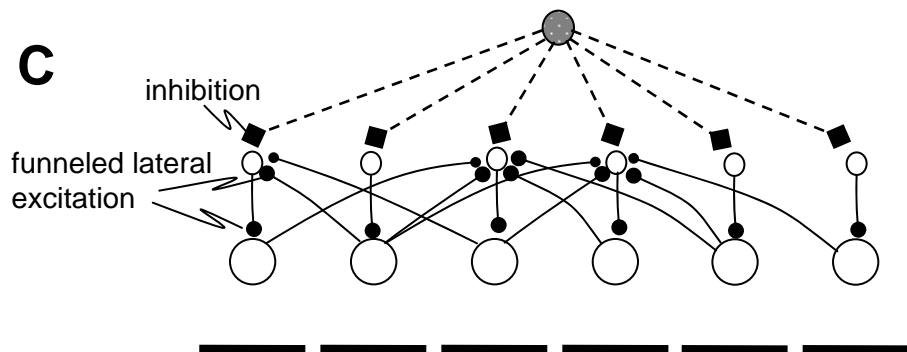

Supplement: S1 (10.1371/journal.pcbi.0030165.s001) [file journal.pcbi.0030165.s001]
